# Supplementary material for: VEGF (Vascular Endothelial Growth Factor) Induces NRP1 (Neuropilin-1) Cleavage via ADAMs (a Disintegrin and Metalloproteinase) 9 and 10 to Generate Novel Carboxy-Terminal NRP1 Fragments That Regulate Angiogenic Signaling
Source: PubMed Central journal article supplement (PMC6092111; doi:10.1161/atvbaha.118.311118), 2018-06-07

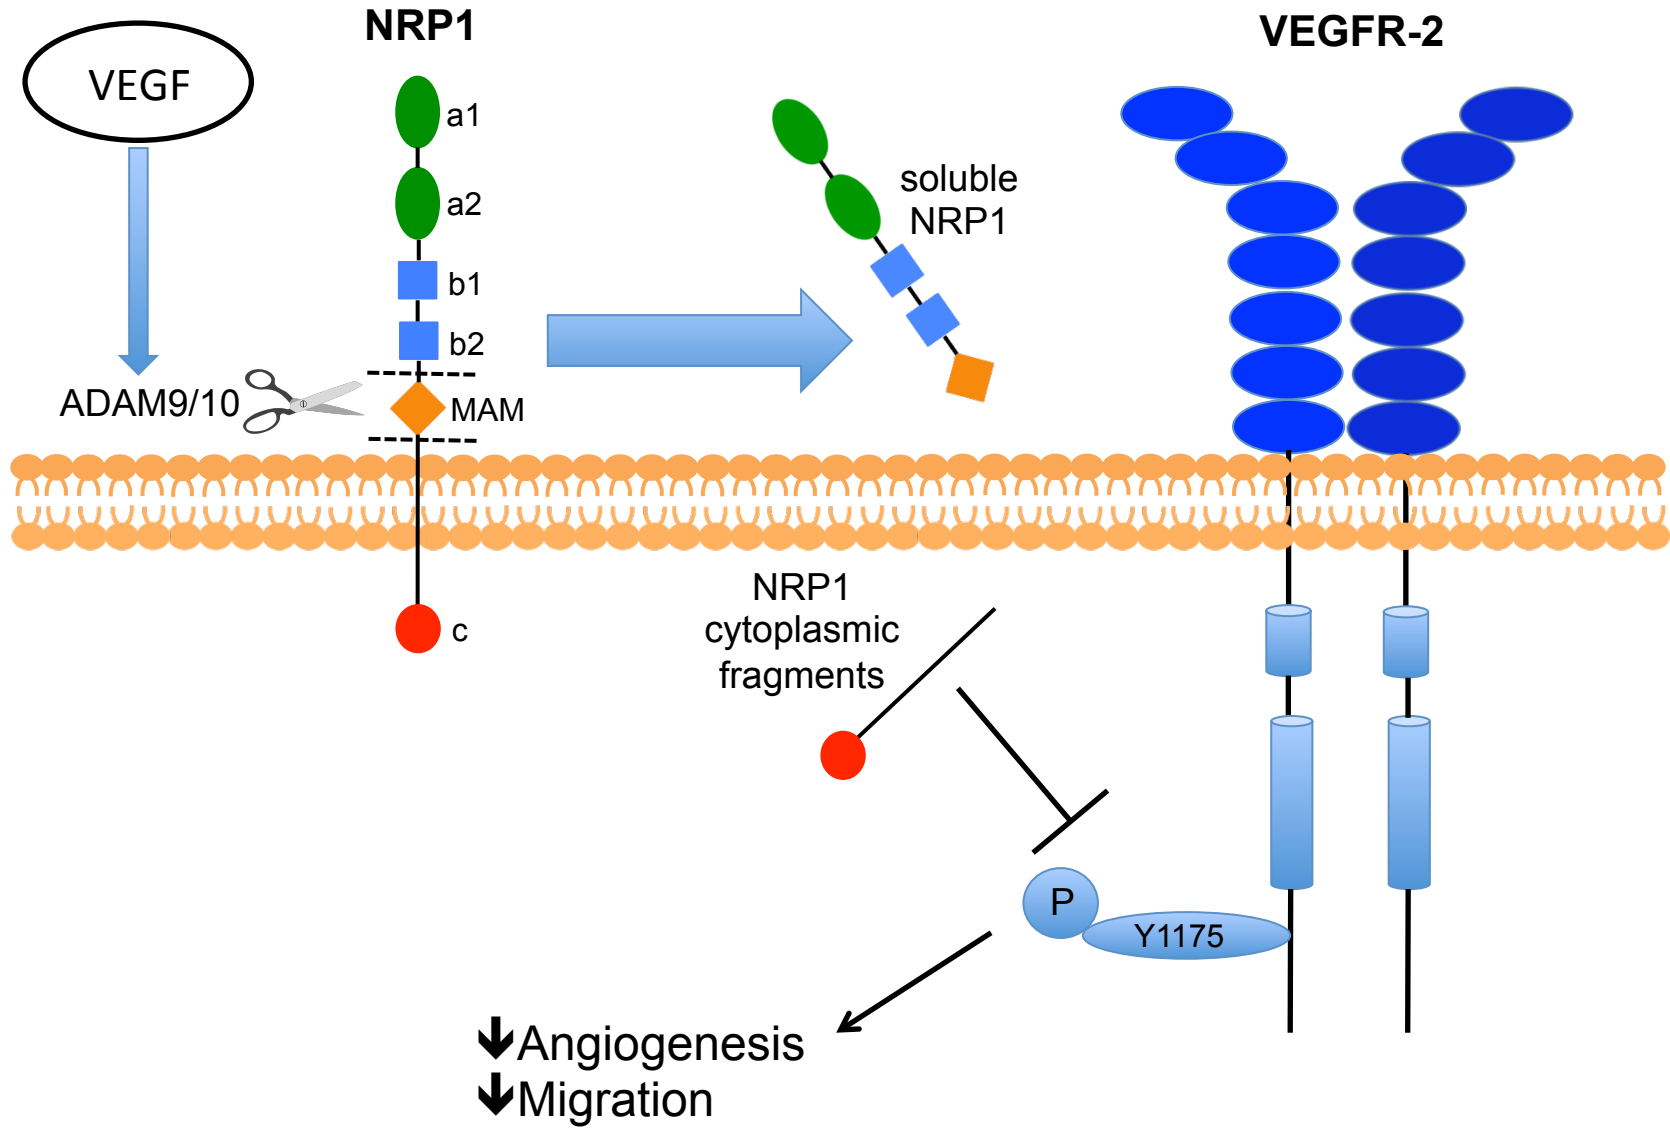

Supplement: atv-38-1845-s001.pdf [file atv-38-1845-s001.pdf]
